RESEARCH ARTICLE

# A 20 bp Duplication in Exon 2 of the Aristaless-Like Homeobox 4 Gene (*ALX4*) Is the Candidate Causative Mutation for Tibial Hemimelia Syndrome in Galloway Cattle

Bertram Brenig<sup>1\*</sup>, Ekkehard Schütz<sup>1</sup>, Michael Hardt<sup>2</sup>, Petra Scheuermann<sup>2</sup>, Markus Freick<sup>3</sup>

**1** Institute of Veterinary Medicine, Georg-August-University of Göttingen, 37077 Göttingen, Germany, **2** Landesuntersuchungsanstalt für das Gesundheits- und Veterinärwesen Sachsen, 04158 Leipzig, Germany, **3** Veterinary Practice Zettlitz, Straße der Jugend 68, 09306 Zettlitz, Germany

\* [bbrenig@gwdg.de](mailto:bbrenig@gwdg.de)

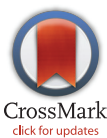

**OPEN ACCESS**

**Citation:** Brenig B, Schütz E, Hardt M, Scheuermann P, Freick M (2015) A 20 bp Duplication in Exon 2 of the Aristaless-Like Homeobox 4 Gene (*ALX4*) Is the Candidate Causative Mutation for Tibial Hemimelia Syndrome in Galloway Cattle. PLoS ONE 10(6): e0129208. doi:10.1371/journal.pone.0129208

**Academic Editor:** Marinus F.W. te Pas, Wageningen UR Livestock Research, NETHERLANDS

**Received:** February 19, 2015

**Accepted:** May 6, 2015

**Published:** June 15, 2015

**Copyright:** © 2015 Brenig et al. This is an open access article distributed under the terms of the [Creative Commons Attribution License](https://creativecommons.org/licenses/by/4.0/), which permits unrestricted use, distribution, and reproduction in any medium, provided the original author and source are credited.

**Data Availability Statement:** All relevant data are within the paper.

**Funding:** This work was supported by a grant of the Exleben Research & Innovation Council to BB (ERIC-BR1959-2013-01). Veterinary Practice Zettlitz provided support in the form of a salary for author MF, but did not have any additional role in the study design, data collection and analysis, decision to publish, or preparation of the manuscript. The specific roles of all authors are articulated in the "author contributions" section.

## Abstract

Aristaless-like homeobox 4 (*ALX4*) gene is an important transcription regulator in skull and limb development. In humans and mice *ALX4* mutations or loss of function result in a number of skeletal and organ malformations, including polydactyly, tibial hemimelia, omphalocele, biparietal foramina, impaired mammary epithelial morphogenesis, alopecia, coronal craniosynostosis, hypertelorism, depressed nasal bridge and ridge, bifid nasal tip, hypogonadism, and body agenesis. Here we show that a complex skeletal malformation of the hind limb in Galloway cattle together with other developmental anomalies is a recessive autosomal disorder most likely caused by a duplication of 20 bp in exon 2 of the bovine *ALX4* gene. A second duplication of 34 bp in exon 4 of the same gene has no known effect, although both duplications result in a frameshift and premature stop codon leading to a truncated protein. Genotyping of 1,688 Black/Red/Belted/Riggitt Galloway (GA) and 289 White Galloway (WGA) cattle showed that the duplication in exon 2 has allele frequencies of 1% in GA and 6% in WGA and the duplication in exon 4 has frequencies of 23% in GA and 38% in WGA. Both duplications were not detected in 876 randomly selected German Holstein Friesian and 86 cattle of 21 other breeds. Hence, we have identified a candidate causative mutation for tibial hemimelia syndrome in Galloway cattle and selection against this mutation can be used to eliminate the mutant allele from the breed.

## Introduction

Vertebrate limb development is a complex process regulated by two signalling centres, the apical ectodermal ridge (AER) and the zone of polarizing activity (ZPA) [1, 2]. Within these centres, several genes coordinate limb growth along the anteroposterior (AP), dorsoventral and proximodistal axes. Once the limb has formed from the shoulder and/or pelvic girdle to the

**Competing Interests:** MF is the owner of Veterinary Practice Zettlitz. There are no patents, products in development or marketed products to declare. This does not alter the authors' adherence to all the PLOS ONE policies on sharing data and materials.

distal tip, the mesenchymal cells begin to condense, differentiate into cartilage, and finally into bone. Although the detailed interactions of many factors involved in this process are still unknown, most of the important genes have been identified [2]. Besides fibroblast growth factors expressed in the AER, sonic hedgehog (SHH) is important in the ZPA for AP patterning. However, AP patterning is controlled by additional factors that are also SHH-independent. Signalling of *GLI3* expressed in the anterior mesenchym for example is responsible for pre-patterning of the limb bud before SHH signalling [2].

Aristaless-like homeobox 4 (*ALX4*) is another transcription regulator involved in skull and limb development and interacts with a plethora of other transcription regulators, e.g. SHH, lymphoid enhancer-binding factor 1 (LEF1), exostosin 2 (EXT2), sex determining region Y-box 10 (SOX10), ALX homeobox 1 (*ALX1*), and GLI family zinc finger 3 (*GLI3*) [3–7]. Expression of *ALX4* has been detected in osteoblast precursors of most bones, the dermal papilla of hair and whisker follicles, the dental papilla of teeth, and a subset of mesenchymal cells in pubescent mammary glands [8].

In limb development, *ALX4* expression in the anterior margin limb bud is under the control of *GLI3* and SHH. Within this cascade, disruption of *ALX4* results in an anterior ectopic expression of SHH and the formation of extra digits as shown in *Alx4*<sup>-/-</sup> mice [9, 10]. Due to its restricted expression at sites of epithelial-mesenchymal interactions, *ALX4* is also important in calvarial bone development. In the congenital hydrocephalus mutant mouse, downregulation of *ALX4* expression as a result of forkhead/winged helix transcription factor (*Foxc1*) loss of function disrupts the progression of osteogenesis [11]. Mutations in the human *ALX4* gene have been shown to be causative for a number of similar skull and limb defects [12–17].

Different congenital skeletal malformations have been reported in livestock, however, only a few have been clarified on a molecular level so far, e. g. brachyspina, complex vertebral malformation, and syndactyly [18–24]. Cases of tibial hemimelia (TH) have been reported in Galloway, Bunaji, and Shorthorn cattle [25–28]. The first report on TH in cattle was published in 1951 in the Scottish Galloway breed [28]. Affected calves were either stillborn or died shortly after birth and showed multiple congenital skeletal deformities, including shortened or absent tibia, abdominal hernia, cryptorchidism, failed Müllerian duct development, hirsutism, and improper neural tube closure, resulting in meningocele [29]. In the early 1970's further cases of TH in Galloway cattle were reported in Germany and the US [26]. In these studies 12 deformed Galloway calves have been analyzed with moderate to severe internal hydrocephalus, meningoencephalocele, ventral abdominal hernia, and bilateral agenesis of the patella and tibia [30].

In Holstein Friesian, a complete absence of the thoracic limbs (amelia) has been associated with chromosomal instabilities without an inherited background. Hence, it can be speculated that the etiology of limb malformations might be heterogenous including hereditary as well as environmental factors [31]. In humans, congenital aplasia and dysplasia of the tibia with intact fibula has been reported in the late 1970's and classified into four types of deformation ranging from a total absence of the tibia including a hypoplastic distal femoral epiphysis, presence of proximal or distal parts of the tibia to diastasis [32]. In several cases, additional visceral and skeletal deformities of other limbs, i. e. femur, foot, double fibula, were also found [32]. Although, in bovine syndactyly of German Holstein, German Fleckvieh and crossbreeds, *ALX4* was excluded as a candidate gene [33], its involvement in other skeletal malformations remains elusive. Due to its key role in limb development, we hypothesized that *ALX4* is a candidate gene for tibial hemimelia syndrome in Galloway cattle.

**Table 1. PCR primers for bovine ALX4 gene amplification and mutation analysis.**

| Primer                       | 5' - 3' <sup>a)</sup>                    | Position <sup>b)</sup> | T <sub>a</sub> (°C) <sup>c)</sup> | Product size (bp) |
|------------------------------|------------------------------------------|------------------------|-----------------------------------|-------------------|
| <i>Exon 1 primers</i>        |                                          |                        |                                   |                   |
| Alx4ex1fwd                   | CCTCCTGGCCTCTCCTAACT                     | 75187092..75187111     | 52                                | 598               |
| Alx4ex1rev                   | CAGCAAGTTGATCGCGTTT                      | 75186514..75186532     |                                   |                   |
| <i>Exon 2 primers</i>        |                                          |                        |                                   |                   |
| BT_ALX4_Ex2_fwd              | GGGATGGGGAGACAGACTAG                     | 75178748..75178767     | 63                                | 229               |
| BT_ALX4_Ex2_rev              | ACCCAGAGCTCTTGATGTCC                     | 75178539..75178558     |                                   |                   |
| ALX4_Ex2fwd                  | TCCCTCTACCTCTCGGGC                       | 75154752..75154770     | 55                                | 443               |
| ALX4_Ex2rev                  | CCTGTCTCGGGCCACTG                        | 75154328..75154344     |                                   |                   |
| <i>Exon 3 primers</i>        |                                          |                        |                                   |                   |
| ALX4_Ex3fwd                  | GATTCTGCCGTAGTCTGTGG                     | 75364265..75364284     | 62                                | 786               |
| ALX4_Ex3rev                  | CTTCAGCATTCTCGGTTC                       | 75363499..75363517     |                                   |                   |
| <i>Exon 4 primers</i>        |                                          |                        |                                   |                   |
| ALX4_Ex4fwd                  | AAAGCCTCCCAGGTAACAC                      | 75361464..75361483     | 60                                | 611               |
| ALX4_Ex4rev                  | GAAAGTGCTGAGGGTCAGG                      | 75360873..75360891     |                                   |                   |
| bALX4_rev                    | GCCAAGACGGTGCTCAGGC                      | 75179672..75179690     | 60                                | 306               |
| bALX4_del                    | ATCCTGTGCGACCCCTCCC                      | 75179957..75179976     |                                   |                   |
| <i>Exon 2 (FRET primers)</i> |                                          |                        |                                   |                   |
| bALX4_RNA_Ex2F_neu           | GAAGACCCACTACCCCGATG                     | 75154452..75154471     | 60                                | 144               |
| ALX4_Ex2rev                  | CCTGTCTCGGGCCACTG                        | 75154328..75154344     |                                   |                   |
| bALX4_Ex2_Probe              | CGTGACCTCACCGAGGCC(Fic)                  |                        |                                   |                   |
| bALX4_Ex2_Anchor             | (Cy5)TGCAGGTACAGTGAGGGTGCCAGGGAAG(Pho)   | 75154374..75154400     |                                   |                   |
| <i>Exon 4 (FRET primers)</i> |                                          |                        |                                   |                   |
| bALX4_RNA_Ex4F               | CAGAACCCGTCCTGGATC                       | 75361324..75361342     | 67                                | 136               |
| bALX4_RNA_Ex4R               | AGTCGGTGACGCCGCT                         | 75361207..75361222     |                                   |                   |
| bALX4Ex4_Probe               | CCCGGTGCGTGCCGGCCTGTGT(FLC)              |                        |                                   |                   |
| bALX4Ex4_Anchor              | (Cy5)GCCCTGTGACCCGGTGCCCGCCTGCATGTC(PHO) | 75361254..75361283     |                                   |                   |

Note. a) Fic: Fluorescein, Cy5: Cyanine 5, Pho: Phosphorylation

b) Positions refer to AC\_000172 (Bos\_taurus\_UMD3.1)

c) T<sub>a</sub> = annealing temperature

doi:10.1371/journal.pone.0129208.t001

## Materials and Methods

### Blood, tissue and DNA samples

A total of 1688 DNA samples of the most common Galloway varieties (Black/Red/Belted/Riggitt Galloway: GA), and 289 White Galloway (WGA) were randomly selected from the DNA depository at the Institute of Veterinary Medicine. In addition, 876 German Holstein Friesian (HF) and 86 DNA samples of 21 different cattle breeds, *i.e.* Aberdeen Angus (2), Aubrac (1), Blonde d'Aquitaine (5), Brown Swiss (3), Charolais (9), Chianina (7), German Angus (5), German Black Pied cattle (2), German Simmental (5), Glanrind (5), German Yellow cattle (1), Hereford (4), Scottish Highland (3), Limousin (4), Piemonteser (7), Red Holstein (8), German Red Highlander (1), Angler (3), Welsh Black (2), Belgian Blue (2), and White Park (7) were included.

Tissue samples of two TH affected Galloway cattle (V.1, V.2) and hair samples of their relatives were provided by K. Kipping (Rüx/Germany). Blood samples were drawn by Dr. M. Freick as part of routine diagnostic procedures (parentage control, epidemiological testing)

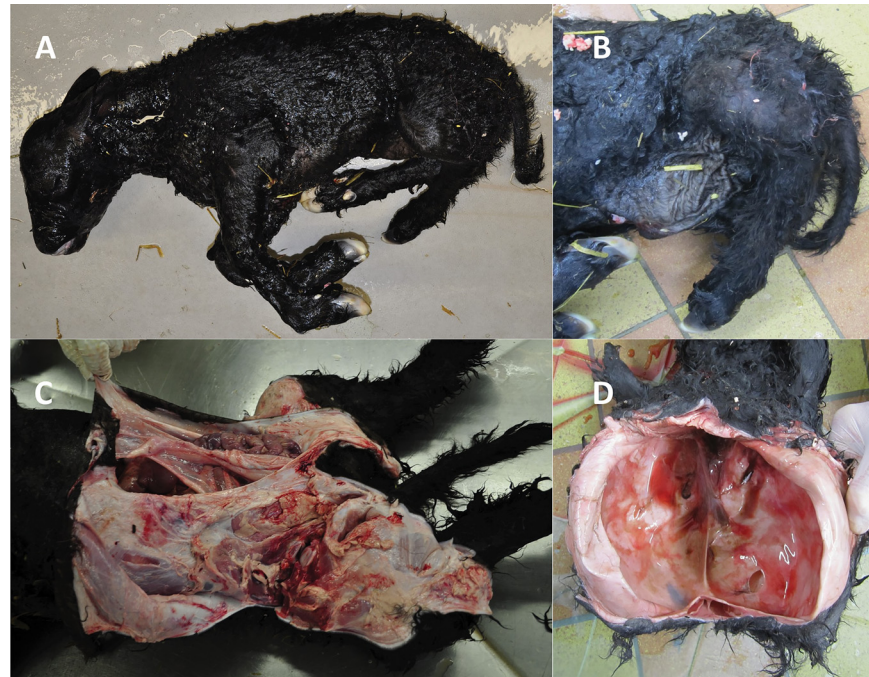

**Fig 1. Congenital anomalies and malformations in Black Galloway calves.** Stillborn calves showed several malformations including A) arthrogyposis multiplex, B) tibial hemimelia, B/C) abdominal hernia (omphalocele), and D) acerebral macrocephaly with cranioschisis. Calf V.1 (Fig 3) is shown in A, B, C and calf V.2 (Fig 3) is shown in D.

doi:10.1371/journal.pone.0129208.g001

with informed owner consent, therefore the study was exempt of ethical approval according to the German regulations.

A total of 15 DNA samples were available for the analysis. DNA from blood samples was extracted using a salting out procedure [34] or the MagNA Pure LC DNA Isolation Kit I (Roche Diagnostics). For the isolation of DNA from tissue samples the DNeasy Blood and Tissue Kit (Qiagen) or the MagNA Pure LC DNA Isolation Kit II (Roche Diagnostics) was used according to the manufacturer's protocols.

### ALX4 sequence, PCR primers, and analysis of mutations

The bovine *ALX4* gene is located on BTA15q28-q29 between positions 74,452,084–74,486,658 Mb and harbours 4 exons coding for a protein of 397 amino acids [33]. Due to the fact that the *ALX4* gene has not yet been correctly annotated and larger gaps exist in intron 1 and 2, it is not possible to give exact distances. As reference the bovine *ALX4* DNA sequence deposited with accession number NC\_007313 at NCBI (Btau\_4.6.1) and AC\_000172 (Bos\_taurus\_UMD3.1) was used. Numbering of positions refers to AC\_000172 (Bos\_taurus\_UMD3.1) and complies with the Human Genome Variation Society (HGVS) nomenclature [35]. For comparison of sequences, exons and adjacent intronic regions were amplified using PCR primers shown in Table 1. PCR primers were designed using the online software tool Primer3 [36].

For high throughput genotyping of the duplications in exon 2 and 4 fluorescence resonance energy transfer (FRET) assays were developed [37, 38]. Analysis of exon 2 was done in a total volume of 5  $\mu$ l, 0.3 U *Taq* DNA polymerase (Roche Diagnostics GmbH), 20 pmol dNTPs each (Roche Diagnostics GmbH), 0.6 pmol bALX4\_RNA\_Ex2F\_neu, 2 pmol ALX4\_Ex2rev, 4 pmol bALX4\_Ex2\_Probe, 4 pmol bALX4\_Ex2\_Anchor, 1 x PCR buffer (incl. MgCl<sub>2</sub>, Roche

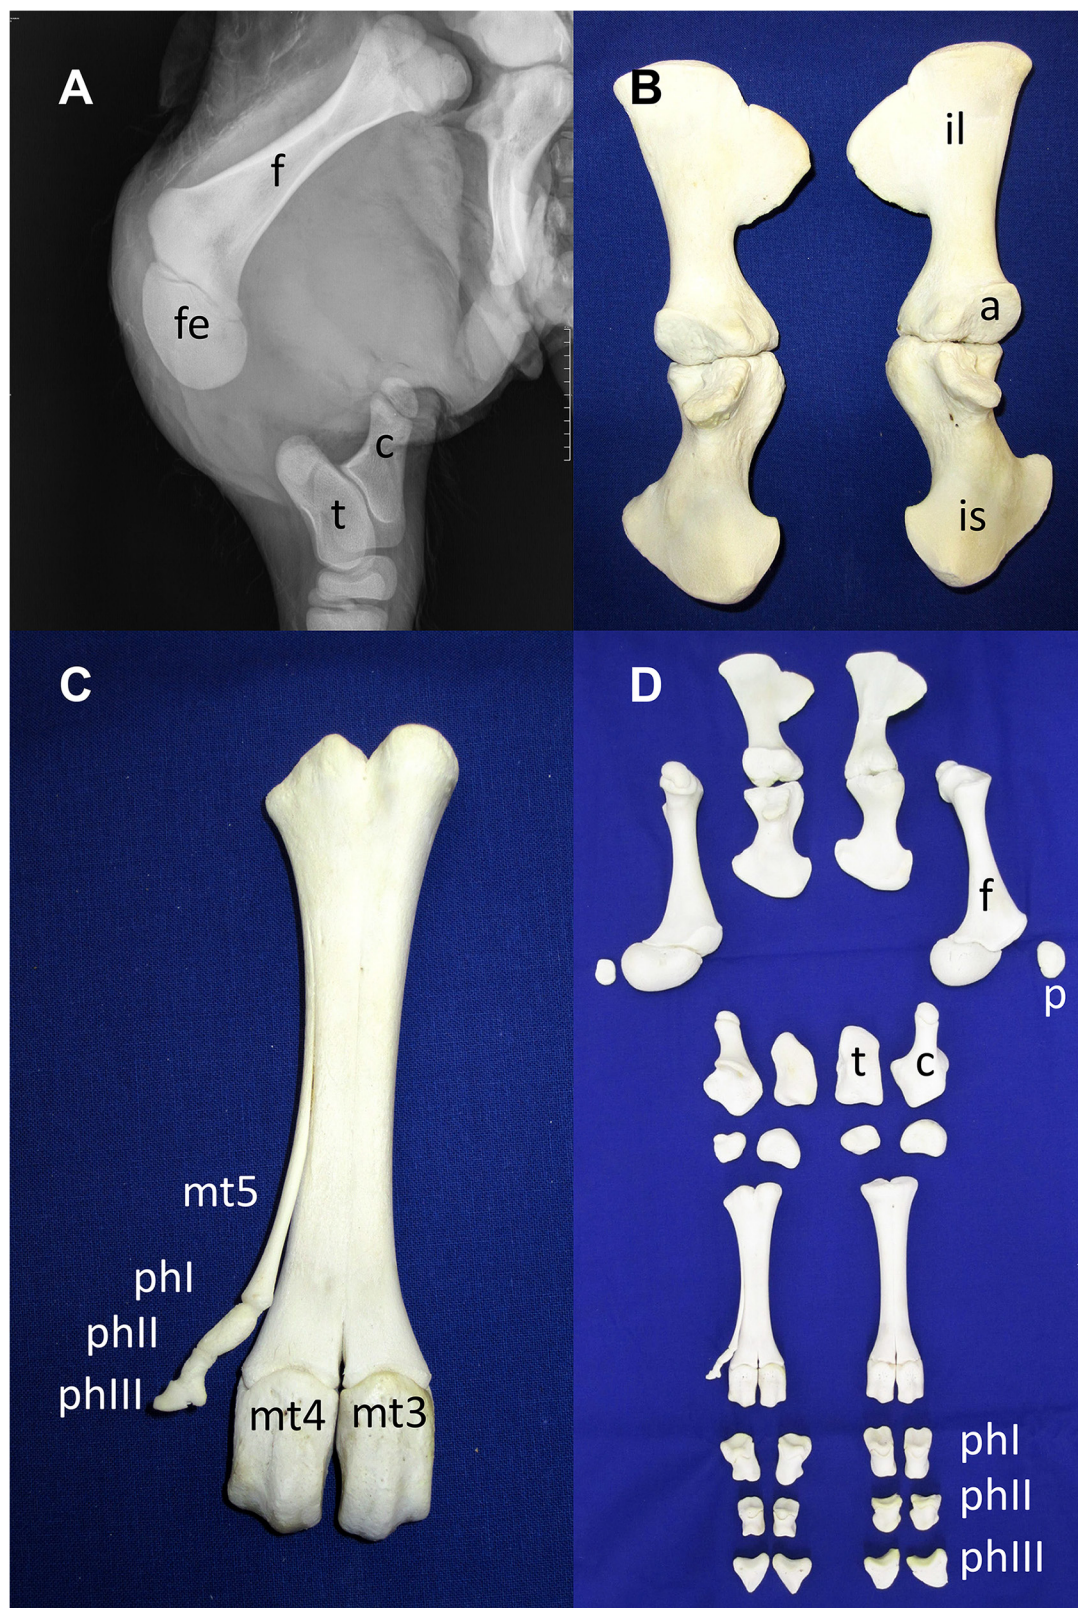

**Fig 2. X-ray analysis and maceration of the hind legs of affected calf V.1.** X-ray analysis showed complete absence of the tibia and fibular rudiment. Visible bone rudiments represent rounded distal femoral epiphysis and malformed femoral condyles (A, fe). Maceration of the hind legs revealed separated and disconnected pelvic bones (B, D) and polydactyly of the metatarsus with rudimentary phalangeal bones (C mt5, phI-III, D). f: Femur; fe: Distal femoral epiphysis; c: Calcaneus; t: Talus; mt3-5: Metatarsals 3–5; phI-III: Phalanges I-III; il: Ilium; a: Acetabulum; is: Ischium; p: Patella.

doi:10.1371/journal.pone.0129208.g002

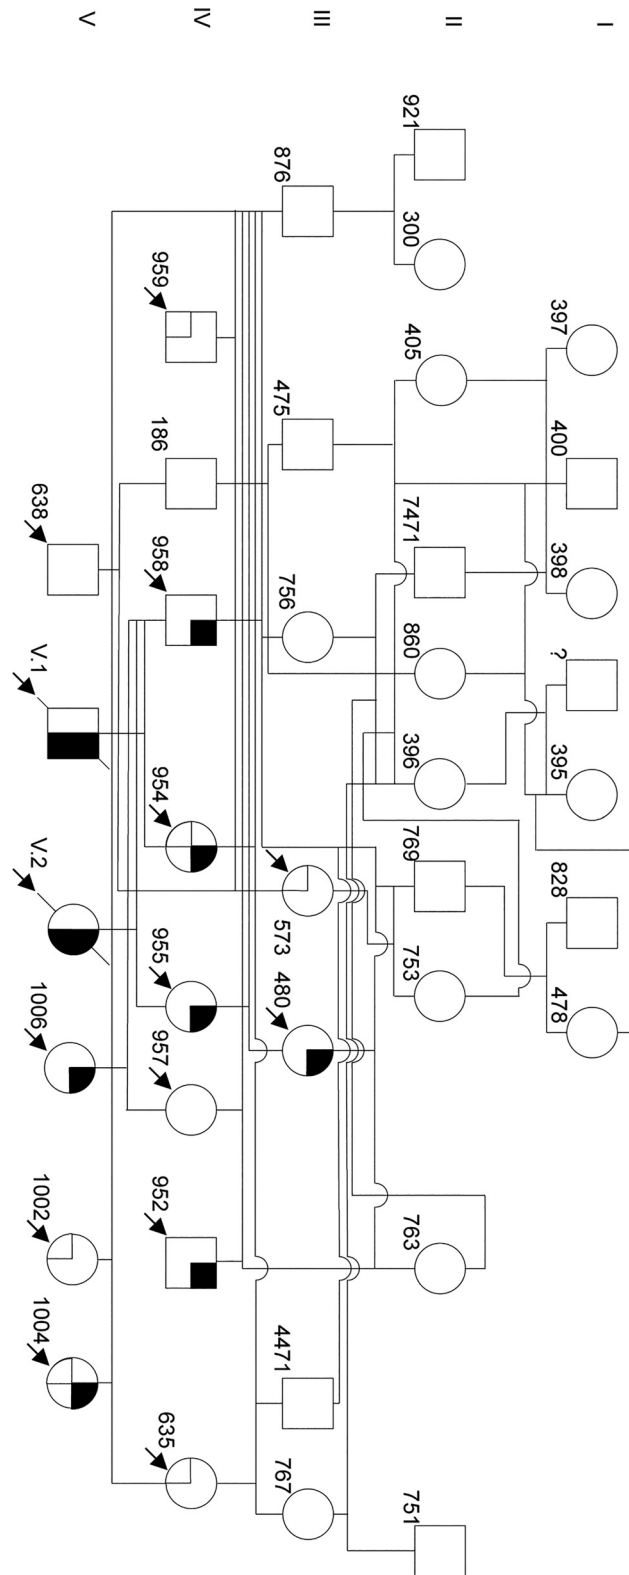

**Fig 3. Pedigree analysis of the affected Galloway cattle family.** The graph shows the 5 generation pedigree of the tibial hemimelia affected Galloway cattle. Pedigree symbols are according to the standardized human pedigree nomenclature [58]. Numbers at the lower left of the symbols refer to the 3 or 4 last digits of the individual ear tag numbers. The affected calves (V.1, V.2) did not receive an ear tag number due to

stillbirth. Arrows indicate samples that were provided for analysis. Symbol segments indicate the presence of the exon 2 (black) and exon 4 (cross hatched) duplications. The pedigree was drawn using Microsoft PowerPoint for Mac 2011 Version 14.4.8 (150116).

doi:10.1371/journal.pone.0129208.g003

Diagnostics GmbH), 1 x Q-Solution, 20 ng template DNA were mixed and cycled in a LightCycler 480 (Roche Diagnostics GmbH) using filter set 483–670 nm (Table 1). Amplification was done with an initial denaturation at 95°C, 5 min, followed by 30–35 cycles at 95°C, 30 sec, 60°C, 1 min, 72°C 30 sec and a final elongation at 72°C for 5 min. Melting was done at 95°C, 30 sec (4.4°C/sec), 50°C, 1 sec (2.2°C/sec), 80°C acquisition mode continuous (0.29°C/sec), and 50°C, 30 sec (2.2°C/sec).

Analysis of exon 4 was done in a total volume of 10 µl, 0.6 U *Taq* DNA polymerase (Roche Diagnostics GmbH), 40 pmol dNTPs each (Roche Diagnostics GmbH), 4 pmol bALX4\_RNA\_Ex4F, 12 pmol bALX4\_RNA\_Ex4R, 4 pmol bALX4\_Ex4\_Probe, 20 pmol bALX4\_Ex4\_Anchor, 1 x PCR buffer (incl. MgCl<sub>2</sub>, Roche Diagnostics GmbH), 1 x Q-Solution, 20 ng template DNA were mixed and cycled in a LightCycler 480 (Roche Diagnostics GmbH) using filter set 483–670 nm (Table 1). Amplification was done with an initial denaturation at 95°C, 5 min, followed by 45–50 cycles at 95°C, 30 sec, 67°C, 1 min, 72°C 30 sec and a final elongation at 72°C for 5 min. Melting was done at 95°C, 30 sec (4.4°C/sec), 50°C, 1 sec (2.2°C/sec), 90°C acquisition mode continuous (0.29°C/sec), and 50°C, 30 sec (2.2°C/sec).

## DNA sequencing and analysis

PCR products were purified using the ExoSAP-IT PCR Product Cleanup (USB) and sequenced with the BigDye Terminator v3.1 Cycle Sequencing Kit (Applied Biosystems) on an ABI PRISM 3130xl Genetic Analyzer (Life Technologies) according to the manufacturers' protocols. Sequencing primers are listed in Table 1 and are the same as used for PCR. For sequence comparison and identification of sequence variations seven animals of the cattle family including the two affected calves, i.e. 573, 954, 955, 957, 958, V.1, and V.2, were used.

Raw DNA sequence data were imported into Sequencher 5.2.3 (Build 12903) (Gene Codes) and manually checked for ambiguities using NC\_007313 (Btau 4.6.1) and AC\_000172 (UMD 3.1) as reference sequence.

For *in silico* prediction of splice site mutation effects NNSPLICE 0.9 and Human Splicing Finder was used [39, 40].

## Results

### Clinical and pathological analysis

In a Black Galloway cattle family problematic pregnancies of two dams (954, 955) with signs of premature calving approx. 10–14 day before the calculated date were reported to the farm veterinarian. The veterinary medical examination revealed that both calves were not alive anymore. It was possible to deliver one calf (V.1) vaginally after manual correction of leg positions. The other calf (V.2) had an abnormal posture that could not be corrected and therefore had to be extracted by fetotomy. Stillbirth was confirmed in both calves by fetal atelectasis of the lungs. Hence, extramedullar haematopoiesis was found as an additional fetal character. Both calves showed multiple malformations, i.e. abdominal hernia, arthrogryposis multiplex, and syndromic acerebral macrocephaly (Fig 1).

An X-ray analysis and maceration of the hind legs of calf V.1 revealed a specific aplasia of the tibia (Fig 2). Further malformations were apparent affecting the pelvic bone. The left and right parts of the pelvic bone were not connected due to the lack of the pubic bone. The distal

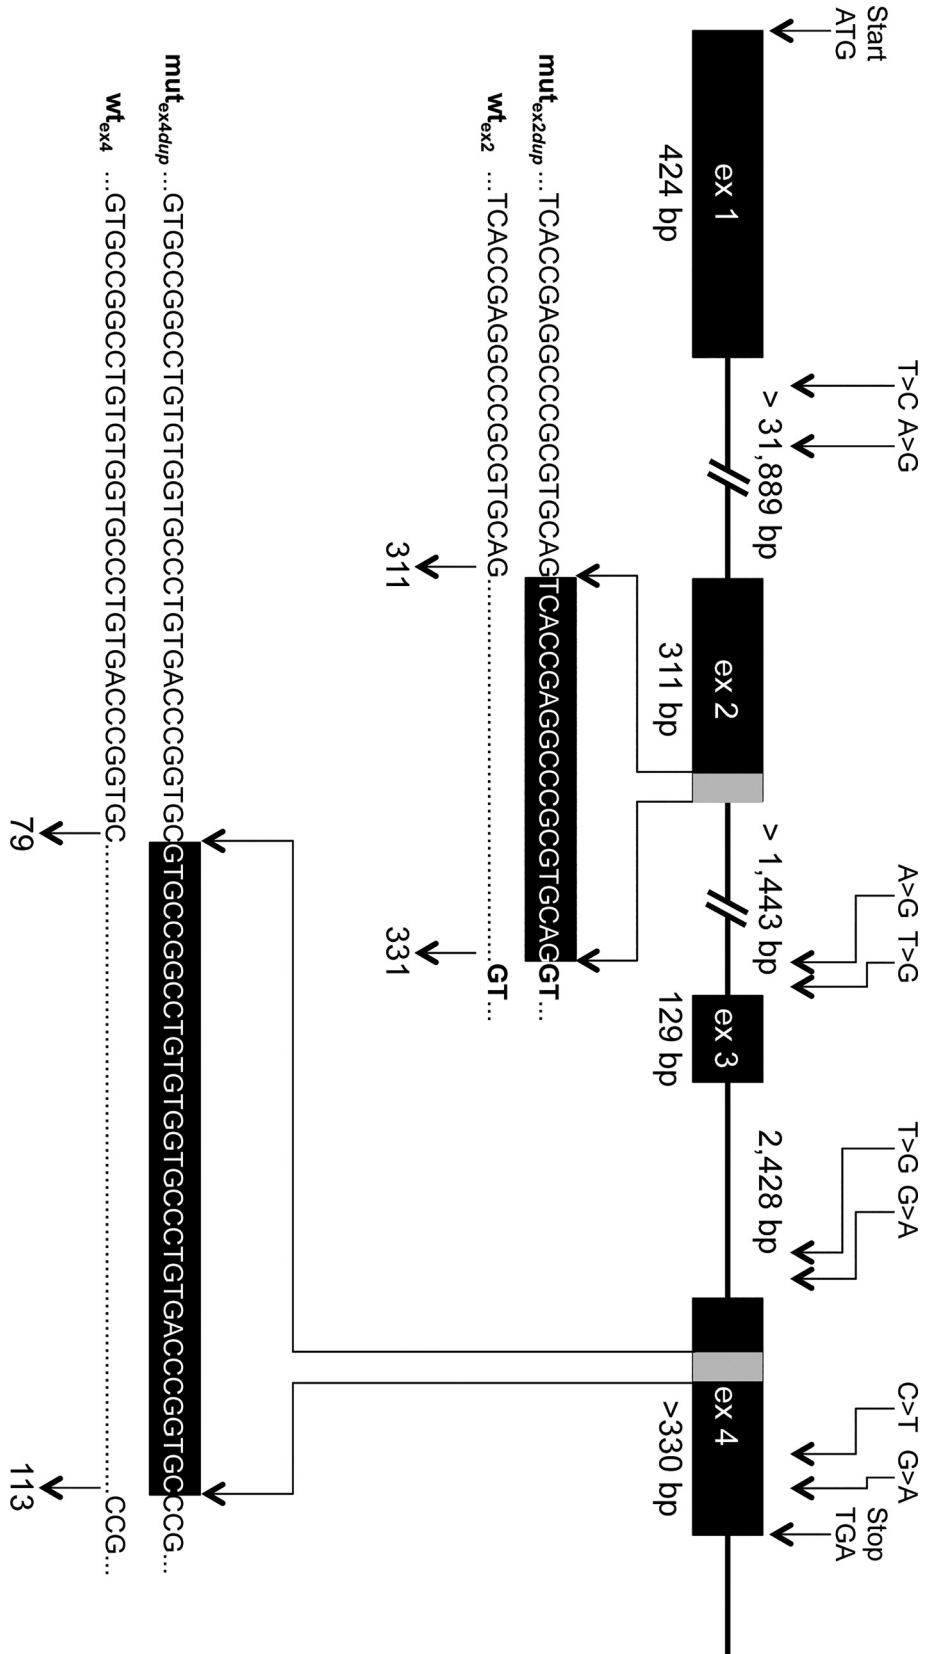



**Fig 4. Genomic structure of the bovine *ALX4* gene and positions of variants detected in Galloway cattle.** The genomic structure of the bovine *ALX4* gene as deduced from AC\_00172 (*Bos taurus*\_UMD\_3.1), NC\_007313 (*Btau*\_4.6.1), and NM\_001030304 is depicted [33]. Sizes of intron 1 and 2 are not yet known due to larger gaps. Numbering of positions refers to AC\_000172. Duplicated sequences in exon 2 and exon 4 in the affected animals are shown with gray bars. Numbers below the sequences indicate the corresponding nucleotide positions of the wildtype (wt<sub>ex2</sub>, wt<sub>ex4</sub>) and mutated (mut<sub>ex2dup</sub>, mut<sub>ex4dup</sub>) alleles within the corresponding exon. Positions of the SNPs and duplications according to HGVS [35] are listed in Table 2.

doi:10.1371/journal.pone.0129208.g004

epiphysis of the femur was enlarged and rounded and did not show a normal development of the condyles and intercondylar fossa (Fig 2A, fe). Further distal, a rudimentary lateral metatarsal fifth phalanx can be seen (preaxial polydactyly) (Fig 2C, mt5). A detailed anatomical and pathological examination of calf V.2 was difficult due to the necessary veterinary removal and fragmentation of the fetus by fetotomy.

To exclude that the malformations were caused by infections of the mothers during pregnancy and/or calves a detailed microbiological analysis of common protozoa, bacteria and viruses, *i.e.* *Neospora canium*, *Salmonella* spp., *Brucella* spp., *Leptospira* spp., *Mycobacterium avium* subsp. *paratuberculosis*, *Coxiella burnetii*, *Chlamydia* spp., *Schmallenberg virus*, *Bovine Herpesvirus*, and *Pestivirus*, was performed. No antigens or antibodies were detected (data not shown) and therefore an infectious cause was considered unlikely.

### Sequence analysis of the *ALX4* gene

Tissue samples of the two calves and 13 relatives of the Galloway pedigree (Fig 3) were made available by the Galloway breeder for further molecular genetic examination. From the pedigree shown in Fig 3 an autosomal recessive inheritance of the defect can be predicted. DNA sequence comparison of the coding and flanking intronic regions of the *ALX4* gene in seven animals of the Galloway cattle family revealed 10 SNPs (Fig 4, Table 2). Four of the SNPs detected in introns were located close to the splice acceptor sites of exon 3 and 4 (Table 2). Although these SNPs were rather distant from the exon-intron boundaries with 18 bp (g.75363920T>G), 24 bp (g.75361369G>A), 25 bp g.75363927A>G), and 84 bp (g.75361429T>G), the effect on splicing was analyzed *in silico* by using different splice prediction algorithms recommended by the

**Table 2. Polymorphisms detected in the bovine *ALX4* gene of Galloway cattle<sup>a</sup>.**

| Description <sup>b</sup> | Location | Type        | Effect     |
|--------------------------|----------|-------------|------------|
| g.75178686A>G            | intron 1 | SNP         |            |
| g.75178722T>C            | intron 1 | SNP         |            |
| c.75154399_75154418dup   | exon 2   | duplication | frameshift |
| g.75363920T>G            | intron 2 | SNP         |            |
| g.75363927A>G            | intron 2 | SNP         |            |
| c.75363774C>T            | exon 3   | SNP         | synonymous |
| c.75363861T>C            | exon 3   | SNP         | synonymous |
| g.75361369G>A            | intron 3 | SNP         |            |
| g.75361429T>G            | intron 3 | SNP         |            |
| c.75361028G>A            | exon 4   | SNP         | synonymous |
| c.75361094C>T            | exon 4   | SNP         | synonymous |
| c.75361268_75361301dup   | exon 4   | duplication | frameshift |

Note. a) Polymorphisms were identified by sequence comparison of animals 573, 954, 955, 957, 958, V.1, V.2 (Fig 3)

b) Nomenclature according to HGVS refers to AC\_000172 (*Bos taurus*\_UMD3.1) [35]. Note that sequence variations are listed according to their location.

doi:10.1371/journal.pone.0129208.t002

Exon 2

|                      |                                                        |     |
|----------------------|--------------------------------------------------------|-----|
| ALX4 (wt)            | ...CTTCCAG AAGACCCACT ACCCCGATGT GTACGCGCGG GAGCAGCTGG | 700 |
| ALX4 (mutex2dup)     | ...CTTCCAG AAGACCCACT ACCCCGATGT GTACGCGCGG GAGCAGCTGG | 700 |
| ALX4 (mutex4dup)     | ...CTTCCAG AAGACCCACT ACCCCGATGT GTACGCGCGG GAGCAGCTGG | 700 |
| ALX4 (mutex2/ex4dup) | ...CTTCCAG AAGACCCACT ACCCCGATGT GTACGCGCGG GAGCAGCTGG | 700 |

mut<sub>ex2dup</sub>

|                      |                                                        |     |
|----------------------|--------------------------------------------------------|-----|
| ALX4 (wt)            | CCATGAGGAC CGACCTCACC GAGGCCCGCG TGCAG:..... :.....    | 735 |
| ALX4 (mutex2dup)     | CCATGAGGAC CGACCTCACC GAGGCCCGCG TGCAGTCACC GAGGCCCGCG | 750 |
| ALX4 (mutex4dup)     | CCATGAGGAC CGACCTCACC GAGGCCCGCG TGCAG:..... :.....    | 735 |
| ALX4 (mutex2/ex4dup) | CCATGAGGAC CGACCTCACC GAGGCCCGCG TGCAGTCACC GAGGCCCGCG | 750 |

Exon 3

|                      |                                                        |     |
|----------------------|--------------------------------------------------------|-----|
| ALX4 (wt)            | ::::GTCTG GTTCCAGAAC CGGAGGGCCA AGTGGAGGAA GAGGGAACGC  | 780 |
| ALX4 (mutex2dup)     | TGCAGGTCTG GTTCCAGAAC CGGAGGGCCA AGTGGAGGAA GAGGGAACGC | 800 |
| ALX4 (mutex4dup)     | ::::GTCTG GTTCCAGAAC CGGAGGGCCA AGTGGAGGAA GAGGGAACGC  | 780 |
| ALX4 (mutex2/ex4dup) | TGCAGGTCTG GTTCCAGAAC CGGAGGGCCA AGTGGAGGAA GAGGGAACGC | 800 |

|                      |                                                        |     |
|----------------------|--------------------------------------------------------|-----|
| ALX4 (wt)            | TTCGGGCAAA TGCAGCAGGT TCGGACCCAC TTCTCCACAG CCTACGAGCT | 830 |
| ALX4 (mutex2dup)     | TTCGGGCAAA TGCAGCAGGT TCGGACCCAC TTCTCCACAG CCTACGAGCT | 850 |
| ALX4 (mutex4dup)     | TTCGGGCAAA TGCAGCAGGT TCGGACCCAC TTCTCCACAG CCTACGAGCT | 830 |
| ALX4 (mutex2/ex4dup) | TTCGGGCAAA TGCAGCAGGT TCGGACCCAC TTCTCCACAG CCTACGAGCT | 850 |

|                      |                                                       |     |
|----------------------|-------------------------------------------------------|-----|
| ALX4 (wt)            | GCCCTCCTC ACCCGAGCGG AAAACTATGC CCAGATTCAG AACCCGTCTT | 880 |
| ALX4 (mutex2dup)     | GCCCTCCTC ACCCGAGCGG AAAACTATGC CCAGATTCAG AACCCGTCTT | 900 |
| ALX4 (mutex4dup)     | GCCCTCCTC ACCCGAGCGG AAAACTATGC CCAGATTCAG AACCCGTCTT | 880 |
| ALX4 (mutex2/ex4dup) | GCCCTCCTC ACCCGAGCGG AAAACTATGC CCAGATTCAG AACCCGTCTT | 900 |

Exon 4

|                      |                                                       |     |
|----------------------|-------------------------------------------------------|-----|
| ALX4 (wt)            | GGATCGGCAA CAATGGGGCC GCCTCGCCCG TGCCGGCCTG TGTGGTGCC | 930 |
| ALX4 (mutex2dup)     | GGATCGGCAA CAATGGGGCC GCCTCGCCCG TGCCGGCCTG TGTGGTGCC | 950 |
| ALX4 (mutex4dup)     | GGATCGGCAA CAATGGGGCC GCCTCGCCCG TGCCGGCCTG TGTGGTGCC | 930 |
| ALX4 (mutex2/ex4dup) | GGATCGGCAA CAATGGGGCC GCCTCGCCCG TGCCGGCCTG TGTGGTGCC | 950 |

mut<sub>ex4dup</sub>

|                      |                                                        |      |
|----------------------|--------------------------------------------------------|------|
| ALX4 (wt)            | TGTGACCCGG TGC:..... :..... :..... :..... CCG          | 946  |
| ALX4 (mutex2dup)     | TGTGACCCGG TGC:..... :..... :..... :..... CCG          | 966  |
| ALX4 (mutex4dup)     | TGTGACCCGG TGCCTGTCGG CCTGTGTGGT GCCCTGTGA             | 969  |
| ALX4 (mutex2/ex4dup) | TGTGACCCGG TGCCTGTCGG CCTGTGTGGT GCCCTGTGAC CCGGTGCCCG | 1000 |

|                      |                                                       |      |
|----------------------|-------------------------------------------------------|------|
| ALX4 (wt)            | CCTGCATGTC CCTCAGGCC CACCCCCCGG GCTCCGGGGC CAGCGGCGTC | 996  |
| ALX4 (mutex2dup)     | CCTGCATGTC CCTCAGGCC CACCCCCCGG GCTCCGGGGC CAGCGGCGTC | 1016 |
| ALX4 (mutex2/ex4dup) | CCTGCATGTC CCTCAGGCC CACCCCCCGG GCTCCGGGGC CAGCGGCGTC | 1050 |

|                      |                                                        |      |
|----------------------|--------------------------------------------------------|------|
| ALX4 (wt)            | ACCGACTTCC TGAGCGTCTC GGGGGCTGGC AGCCACGTGG GCCAGACGCA | 1046 |
| ALX4 (mutex2dup)     | ACCGACTTCC TGA                                         | 1029 |
| ALX4 (mutex2/ex4dup) | ACCGACTTCC TGAGCGTCTC GGGGGCTGGC AGCCACGTGG GCCAGACGCA | 1100 |

|                      |                                                        |      |
|----------------------|--------------------------------------------------------|------|
| ALX4 (wt)            | CATGGGCAGC CTGTTTGGAG CTGCGGGCCT CAGCCCGGGC CTCAACGGCT | 1096 |
| ALX4 (mutex2/ex4dup) | CATGGGCAGC CTGTTTGGAG CTGCGGGCCT CAGCCCGGGC CTCAACGGCT | 1150 |

|                      |                                                        |      |
|----------------------|--------------------------------------------------------|------|
| ALX4 (wt)            | ATGAGCTCAA CGGGGAGCCG GACCGCAAGA CTTCGAGCAT CGCGGCCCTC | 1146 |
| ALX4 (mutex2/ex4dup) | ATGAGCTCAA CGGGGAGCCG GACCGCAAGA CTTCGAGCAT CGCGGCCCTC | 1200 |

|                      |                                                      |      |
|----------------------|------------------------------------------------------|------|
| ALX4 (wt)            | CGCATGAAGG CCAAGGAGCA CAGCGCGGCC ATCTCCTGGG CCACATGA | 1194 |
| ALX4 (mutex2/ex4dup) | CGCATGAAGG CCAAGGAGCA CAGCGCGGCC ATCTCCTGGG CCACATGA | 1248 |

**Fig 5. Alignment of coding sequences of ALX4 variants.** The coding sequences of the four *ALX4* variants beginning in exon 2 are shown. The exonic regions are indicated with boxes. Stop codons are shown in bold and are underlined. Numbering refers to the respective nucleotide position within the variant.

doi:10.1371/journal.pone.0129208.g005

unclassified genetic variants guidelines [41]. Only SNP g.75363920T>G located in the splice acceptor region 18 bp upstream of exon 3 resulted in a marginal increase of the prediction scores from 0.96 (wild type) to 0.97 (mutant) when using NNSPLICE 0.9 [40].

The SNPs in the coding regions were synonymous mutations. In exon 2 and exon 4 duplications of 20 bp and 34 bp were detected in the affected animals and their parents. Both duplications result in a frameshift leading to a premature stop codon and truncated protein. Fig 5 shows the cDNA alignments of the different *ALX4* variants. The resulting proteins are depicted in Fig 6. The affected calves were homozygous only for the duplication in exon 2 (Table 3). Both cattle were paternal half-siblings of sire #958, who was heterozygous for the duplication in exon 2. Mother #954 of V.1 was carrying both duplications and mother #955 (of V.2) was heterozygous for the exon 2 duplication only. Her mother #480 was also heterozygous for the duplication in exon 2.

To determine the frequency of both duplications in German Galloway cattle (GA: Black, Red, Belted, Riggitt Galloway; WGA: White Galloway) and other cattle breeds, we screened randomly selected cattle of GA, WGA, HF and 21 different breeds (see Materials and Methods). The duplications were only detected in Galloway cattle (Table 4). In Black/Red/Belted/Riggitt Galloway the exon 2 duplication allele frequency was 0.01 and the exon 4 duplication allele frequency was 0.23. WGA showed higher frequencies for both duplications with 0.06 and 0.38, respectively.

## Discussion

In humans tibial hemimelia or agenesis has been described in combination with other more apparent defects, e.g. ectrodactyly and femoral duplication in Gollop-Wolfgang complex [42–44], multiple exostoses and mental retardation in Langer-Giedion syndrome [45], or partial alopecia, frontonasal dysplasia, and hypogonadism in Potocki-Shaffer syndrome [46]. In Gollop-Wolfgang complex and Langer-Giedion syndrome, deletions on chromosome 8q have been identified, whereas Potocki-Shaffer syndrome is caused by deletion and/or mutations of the *ALX4* gene on chromosome 11p11.2 [7, 17]. Thus, human tibial hemimelia seems to be part of a group of heterogeneous genetic disorders.

Pathological findings more precisely reflecting the malformations found in the two Galloway calves have been described in the naturally occurring murine *Alx4Lst* mutant (Strong's luxoid) with defects of the ventral body wall and pelvic girdle together with polydactyly [10, 47]. In addition, a study in the ENU-induced mouse mutant *Alx4<sup>m1Yzcm</sup>* described multiple abnormalities including preaxial polydactyly, malformation (truncation) of the tibia, loss of pubic bones, and formation of omphalocele [48]. These findings show certain similarities to the phenotypic characteristics of the two stillborn calves reported herein and support our hypothesis that *ALX4* is the most likely candidate for TH in Galloway cattle. According to the morphological groups in humans, the two affected calves represented type 3 of congenital tibial aplasia lacking the proximal part of the tibia [32]. A similar pathology has been reported in Shorthorn cattle, however, there is no scientific publication available on the genetic cause in this breed [25]. Apart from that, a DNA-based test in Shorthorn cattle is commercially available based on the US patent US 8,158,356 B2 [49], claiming a large deletion of more than 129 kb of BTA15q (75.18–75.31Mb) including exon 1 of the bovine *ALX4* gene. Since this deletion differs from the mutation identified here, the test for Shorthorn is not applicable in Galloway cattle.

|                      |            |            |            |             |            |
|----------------------|------------|------------|------------|-------------|------------|
|                      | 10         | 20         | 30         | 40          | 50         |
| ALX4 (wt)            | MNAETCVSYC | ESPAAAMDAY | YSPVQSREG  | SSPFRAYPGG  | DKFSTTFLSA |
| ALX4 (mutex2dup)     | -----      | -----      | -----      | -----       | -----      |
| ALX4 (mutex4dup)     | -----      | -----      | -----      | -----       | -----      |
| ALX4 (mutex2/ex4dup) | -----      | -----      | -----      | -----       | -----      |
|                      | 60         | 70         | 80         | 90          | 100        |
| ALX4 (wt)            | AAKGQGFQDA | KSRARYGAGQ | QDPAAPLESG | AGARGSF SKF | QPQPAPQPQ  |
| ALX4 (mutex2dup)     | -----      | -----      | -----      | -----       | -----      |
| ALX4 (mutex4dup)     | -----      | -----      | -----      | -----       | -----      |
| ALX4 (mutex2/ex4dup) | -----      | -----      | -----      | -----       | -----      |
|                      | 110        | 120        | 130        | 140         | 150        |
| ALX4 (wt)            | PPAPQPHLYL | QRGACKTPPD | GSLKLQEGGG | GHNAALQVPC  | YAKESSLGEP |
| ALX4 (mutex2dup)     | -----      | -----      | -----      | -----       | -----      |
| ALX4 (mutex4dup)     | -----      | -----      | -----      | -----       | -----      |
| ALX4 (mutex2/ex4dup) | -----      | -----      | -----      | -----       | -----      |
|                      | 160        | 170        | 180        | 190         | 200        |
| ALX4 (wt)            | ELPPDSDTVG | MDSSYLSVKE | AGVKGPDRA  | SADLPSPMEK  | ADSESNKGGK |
| ALX4 (mutex2dup)     | -----      | -----      | -----      | -----       | -----      |
| ALX4 (mutex4dup)     | -----      | -----      | -----      | -----       | -----      |
| ALX4 (mutex2/ex4dup) | -----      | -----      | -----      | -----       | -----      |
|                      | 210        | 220        | 230        | 240         | 250        |
| ALX4 (wt)            | RRNRITFTSY | QLEELEKVFQ | KTHYPDVYAR | EQLAMRTDLT  | EARVQVWFQN |
| ALX4 (mutex2dup)     | -----      | -----      | -----      | -----       | SPRPA      |
| ALX4 (mutex4dup)     | -----      | -----      | -----      | -----       | -----      |
| ALX4 (mutex2/ex4dup) | -----      | -----      | -----      | -----       | SPRPA      |
|                      | 260        | 270        | 280        | 290         | 300        |
| ALX4 (wt)            | RRAKWRKRER | FGQMQQVRTH | FSTAYELPLL | TRAENYAQIQ  | NPSWIGNNGA |
| ALX4 (mutex2dup)     | CRSGSRTGGP | SGGRGNASGK | CSRFGPTSPQ | PTSCPSSPER  | KTMPRFTRTP |
| ALX4 (mutex4dup)     | -----      | -----      | -----      | -----       | -----      |
| ALX4 (mutex2/ex4dup) | CRSGSRTGGP | SGGRGNASGK | CSRFGPTSPQ | PTSCPSSPER  | KTMPRFTRTP |
|                      | 310        | 320        | 330        | 340         | 350        |
| ALX4 (wt)            | ASPVPACVVP | CDVPACMSP  | HAHPPGSGAS | GVTDFLSVSG  | AGSHVGQTHM |
| ALX4 (mutex2dup)     | GSATMGPPRP | CRPVVCPVTR | CPPACPLTPT | PPAPGPAASP  | TS         |
| ALX4 (mutex4dup)     | -----      | ---RAGLCGA | L          | -----       | -----      |
| ALX4 (mutex2/ex4dup) | GSATMGPPRP | CRPVVCPVTR | CVPACVVPCD | PVPACMSPHA  | HPPGSGASGV |
|                      | 360        | 370        | 380        | 390         | 400        |
| ALX4 (wt)            | GSLFGAAGLS | PGLNGYELNG | EPDRKTSSIA | ALRMKAKEHS  | AAISWAT    |
| ALX4 (mutex2dup)     | -----      | -----      | -----      | -----       | -----      |
| ALX4 (mutex4dup)     | -----      | -----      | -----      | -----       | -----      |
| ALX4 (mutex2/ex4dup) | TDFLSVSGAG | SHVGQTHMGS | LFGAAGLSPG | LNGYELNGEP  | DRKTSSIAAL |
|                      | 410        | 420        |            |             |            |
| ALX4 (wt)            |            |            |            |             |            |
| ALX4 (mutex2dup)     |            |            |            |             |            |
| ALX4 (mutex4dup)     |            |            |            |             |            |
| ALX4 (mutex2/ex4dup) | RMKAKEHSAA | ISWAT      |            |             |            |

**Fig 6. Deduced amino acid sequences of ALX4 variants.** Amino acid sequences were deduced from the coding sequences of the ALX4 variants. Dashes indicate identical amino acid sequences. Corresponding exonic regions are indicated with different colours. Amino acids encoded by exon 1 are shown in green, exon 2 in magenta, exon 3 in cyan, and exon 4 in grey. The altered amino acid sequence due to the exon 2 duplication is shown in yellow. The truncated amino acid sequence of the ALX4(mutex<sub>ex4dup</sub>)-variant is shown in plain text. Wt: Wild type.

doi:10.1371/journal.pone.0129208.g006

**Table 3. ALX4 genotypes of animals of the Galloway cattle family.**

| Animal ID | exon 2                                       | exon 4                                   | Phenotype <sup>a)</sup> | F <sup>b)</sup> | M <sup>c)</sup> |
|-----------|----------------------------------------------|------------------------------------------|-------------------------|-----------------|-----------------|
| V.1       | mut <sub>ex2dup</sub> /mut <sub>ex2dup</sub> | wt <sub>ex4</sub> /wt <sub>ex4</sub>     | THA                     | 958             | 954             |
| V.2       | mut <sub>ex2dup</sub> /mut <sub>ex2dup</sub> | wt <sub>ex4</sub> /wt <sub>ex4</sub>     | THA                     | 958             | 955             |
| 480       | mut <sub>ex2dup</sub> /wt <sub>ex2</sub>     | wt <sub>ex4</sub> /wt <sub>ex4</sub>     | THC                     | 769             | 763             |
| 952       | mut <sub>ex2dup</sub> /wt <sub>ex2</sub>     | wt <sub>ex4</sub> /wt <sub>ex4</sub>     | THC                     | 876             | 763             |
| 954       | mut <sub>ex2dup</sub> /wt <sub>ex2</sub>     | mut <sub>ex4dup</sub> /wt <sub>ex4</sub> | THC                     | 876             | 573             |
| 955       | mut <sub>ex2dup</sub> /wt <sub>ex2</sub>     | wt <sub>ex4</sub> /wt <sub>ex4</sub>     | THC                     | 876             | 480             |
| 958       | mut <sub>ex2dup</sub> /wt <sub>ex2</sub>     | wt <sub>ex4</sub> /wt <sub>ex4</sub>     | THC                     | 876             | 756             |
| 1004      | mut <sub>ex2dup</sub> /wt <sub>ex2</sub>     | mut <sub>ex4dup</sub> /wt <sub>ex4</sub> | THC                     | 876             | 635             |
| 1006      | mut <sub>ex2dup</sub> /wt <sub>ex2</sub>     | wt <sub>ex4</sub> /wt <sub>ex4</sub>     | THC                     | 958             | 957             |
| 573       | wt <sub>ex2</sub> /wt <sub>ex2</sub>         | mut <sub>ex4dup</sub> /wt <sub>ex4</sub> | THF                     | 769             | 753             |
| 635       | wt <sub>ex2</sub> /wt <sub>ex2</sub>         | mut <sub>ex4dup</sub> /wt <sub>ex4</sub> | THF                     | 4471            | 767             |
| 638       | wt <sub>ex2</sub> /wt <sub>ex2</sub>         | wt <sub>ex4</sub> /wt <sub>ex4</sub>     | THF                     | 186             | 573             |
| 957       | wt <sub>ex2</sub> /wt <sub>ex2</sub>         | wt <sub>ex4</sub> /wt <sub>ex4</sub>     | THF                     | 876             | 763             |
| 959       | wt <sub>ex2</sub> /wt <sub>ex2</sub>         | mut <sub>ex4dup</sub> /wt <sub>ex4</sub> | THF                     | 876             | 573             |
| 1002      | wt <sub>ex2</sub> /wt <sub>ex2</sub>         | mut <sub>ex4dup</sub> /wt <sub>ex4</sub> | THF                     | 876             | 635             |

Note. a) THA: Tibial hemimelia affected; THC: Tibial hemimelia carrier; THF: Tibial hemimelia free

b) F: Father

c) M: Mother (see also Fig 3).

doi:10.1371/journal.pone.0129208.t003

So far only single cases of TH in Galloway, Shorthorn or Bunaji cattle have been reported and therefore the frequency of the disorder seems to be rather low [25–28]. As the defect has already been reported in the early 1950’s in Galloway cattle, it is unclear why this has not become a more substantial problem since then [26, 28, 50]. A possible explanation for this discrepancy could be a high number of unreported cases of TH. On the other hand, already in 1979 a strategy for controlling tibial hemimelia syndrome in Galloway cattle has been published [50]. This approach included controlled matings with pregnancy termination at day 90 and subsequent pathological investigation of the fetuses. Today, transrectal ultrasonography seems to be a practical tool to examine fetuses for complex malformations during pregnancy [51].

While none of the two duplications within the *ALX4* gene were detected in 876 German HF and 21 other breeds, the frequency of the mutated allele in exon 2 of the sample of Galloway cattle analyzed here, was relatively high with 1%. 47 heterozygous animals for the exon 2 duplication were identified within the 1688 animals genotyped. Regarding the exon 2 duplication the analyzed population was in Hardy-Weinberg equilibrium (Chi2 = 0.34). This is in contrast to the exon 4 duplication, where 561 heterozygous and 101 homozygous animals were identified resulting in a significant departure from HWE with a Chi2-value of 4.23. It is unclear why there was a significant higher number of observed homozygous exon 4 duplication carriers, especially as this mutation has no effect on the development of TH. Although, there is no scientific evidence available for Galloway cattle, it could be speculated that the heterozygous duplication in exon 2 together with the homo- or heterozygous exon 4 duplication may result in a diserable phenotype and therefore lead to an increased allele frequency. This assumption is supported by the observation that heterozygous carriers of the *ALX4* deletion in Shorthorn cattle are preferred sires due to their straight hind limbs and long shaggy hair coat [29]. Consequently, more than half of the top ten Shorthorn sires were putative carriers in 2004. In the White Galloways cattle analyzed here both duplications were in Hardy-Weinberg equilibrium.

**Table 4. Prevalence of ALX4 gene duplications in exon 2 and exon 4 in different cattle breeds.**

| Breed | Exon 2 |        |         | Exon 4 |        |         | N    |
|-------|--------|--------|---------|--------|--------|---------|------|
|       | wt/wt  | wt/dup | dup/dup | wt/wt  | wt/dup | dup/dup |      |
| GA    | 1641   | 47     | 0       | 1026   | 561    | 101     | 1688 |
| WGA   | 252    | 37     | 0       | 110    | 137    | 42      | 289  |
| HF    | 876    | 0      | 0       | 876    | 0      | 0       | 876  |
| AA    | 2      | 0      | 0       | 2      | 0      | 0       | 2    |
| AU    | 1      | 0      | 0       | 1      | 0      | 0       | 1    |
| BA    | 5      | 0      | 0       | 5      | 0      | 0       | 5    |
| BS    | 3      | 0      | 0       | 3      | 0      | 0       | 3    |
| CHA   | 9      | 0      | 0       | 9      | 0      | 0       | 9    |
| CHI   | 7      | 0      | 0       | 7      | 0      | 0       | 7    |
| GAN   | 5      | 0      | 0       | 5      | 0      | 0       | 5    |
| GB    | 2      | 0      | 0       | 2      | 0      | 0       | 2    |
| GS    | 5      | 0      | 0       | 5      | 0      | 0       | 5    |
| GL    | 5      | 0      | 0       | 5      | 0      | 0       | 5    |
| GY    | 1      | 0      | 0       | 1      | 0      | 0       | 1    |
| HE    | 4      | 0      | 0       | 4      | 0      | 0       | 4    |
| SH    | 3      | 0      | 0       | 3      | 0      | 0       | 3    |
| LI    | 4      | 0      | 0       | 4      | 0      | 0       | 4    |
| PI    | 7      | 0      | 0       | 7      | 0      | 0       | 7    |
| RH    | 8      | 0      | 0       | 8      | 0      | 0       | 8    |
| GRH   | 1      | 0      | 0       | 1      | 0      | 0       | 1    |
| AN    | 3      | 0      | 0       | 3      | 0      | 0       | 3    |
| WB    | 2      | 0      | 0       | 2      | 0      | 0       | 2    |
| BB    | 2      | 0      | 0       | 2      | 0      | 0       | 2    |
| WP    | 7      | 0      | 0       | 7      | 0      | 0       | 7    |

Note. GA: Black/Red/Belted/Riggitt Galloway; WGA: White Galloway; HF: Holstein Friesian; AA: Aberdeen Angus; AU: Aubrac; BA: Blonde d'Aquitaine; BS: Brown Swiss; CHA: Charolais; CHI: Chianina; GE: German Angus; GB: German Black Pied cattle; GS: German Simmental; GL: Glanrind; GY: German Yellow Cattle; HE: Hereford; SH: Scottish Highland; LI: Limousin; PI: Piemonteser; RH: Red Holstein; GRH: German Red Highlander; AN: Angler; WB: Welsh Black; BB: Belgian Blue; WP: White Park

doi:10.1371/journal.pone.0129208.t004

To further analyze the different effects of the two duplications on the function of ALX4, we performed an *in silico* protein structure prediction with SWISS-Model software [52, 53]. As the solution NMR structure of the homeodomain of the human ALX4 protein has been determined recently, this can be used for homology modelling [54, 55]. The bovine wild type ALX4 gene codes for a protein of 397 amino acids, whereas the duplication in exon 2 would result in a truncation of 342 amino acids and the duplication in exon 4 of 322 amino acids. When both duplications are present a protein of 415 amino acids would be expected. While the truncated ALX4 protein resulting from the exon 2 duplication shares only 61.7% N-terminal amino acids with the wild type, the ALX4 protein with the exon 4 duplication is still 79.1% homologous. Although the protein with both duplications is 18 amino acids longer than the wild type ALX4, it shares also only the same 245 N-terminal amino acids as the mut<sub>ex2dup</sub>-variant.

At the C-terminal end of ALX4 an OAR domain is located between positions 377 to 390 [56]. This domain is absent in both the exon 2 and exon 4 duplication. Hence, the loss of the OAR domain cannot explain the development of TH only in the animals homozygous for the exon 2 duplication. However, due to the duplication in exon 2, important parts of helix III of

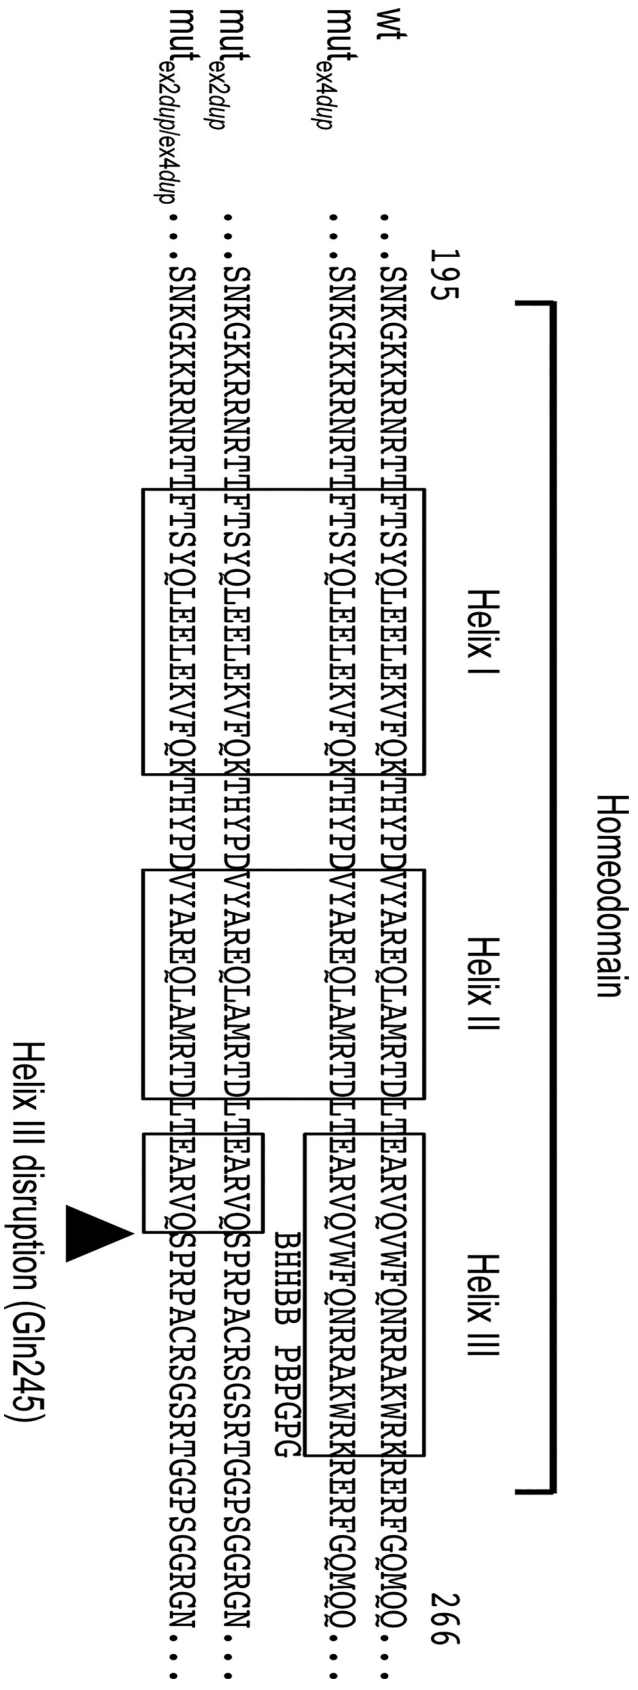

**Fig 7. Comparison of the bovine ALX4 homeodomains of the exon 2 and exon 4 duplication variants.** Alignment of the predicted  $mut_{ex2dup}$ ,  $mut_{ex4dup}$ , and  $mut_{ex2dup/ex4dup}$  ALX4 proteins. The location of the homeodomain consensus regions are indicated with open boxes. The highlighted amino acid positions are highly conserved functional residues in helix III. B: base contact site; G: paralog-group residue; H: hydrophobic core site; P: phosphate backbone contact site [59].

doi:10.1371/journal.pone.0129208.g007

the homeodomain which is necessary for DNA binding, are disrupted [57]. Whereas, in the exon 4 duplication variant the homeodomain is completely preserved. Fig 7 shows the protein

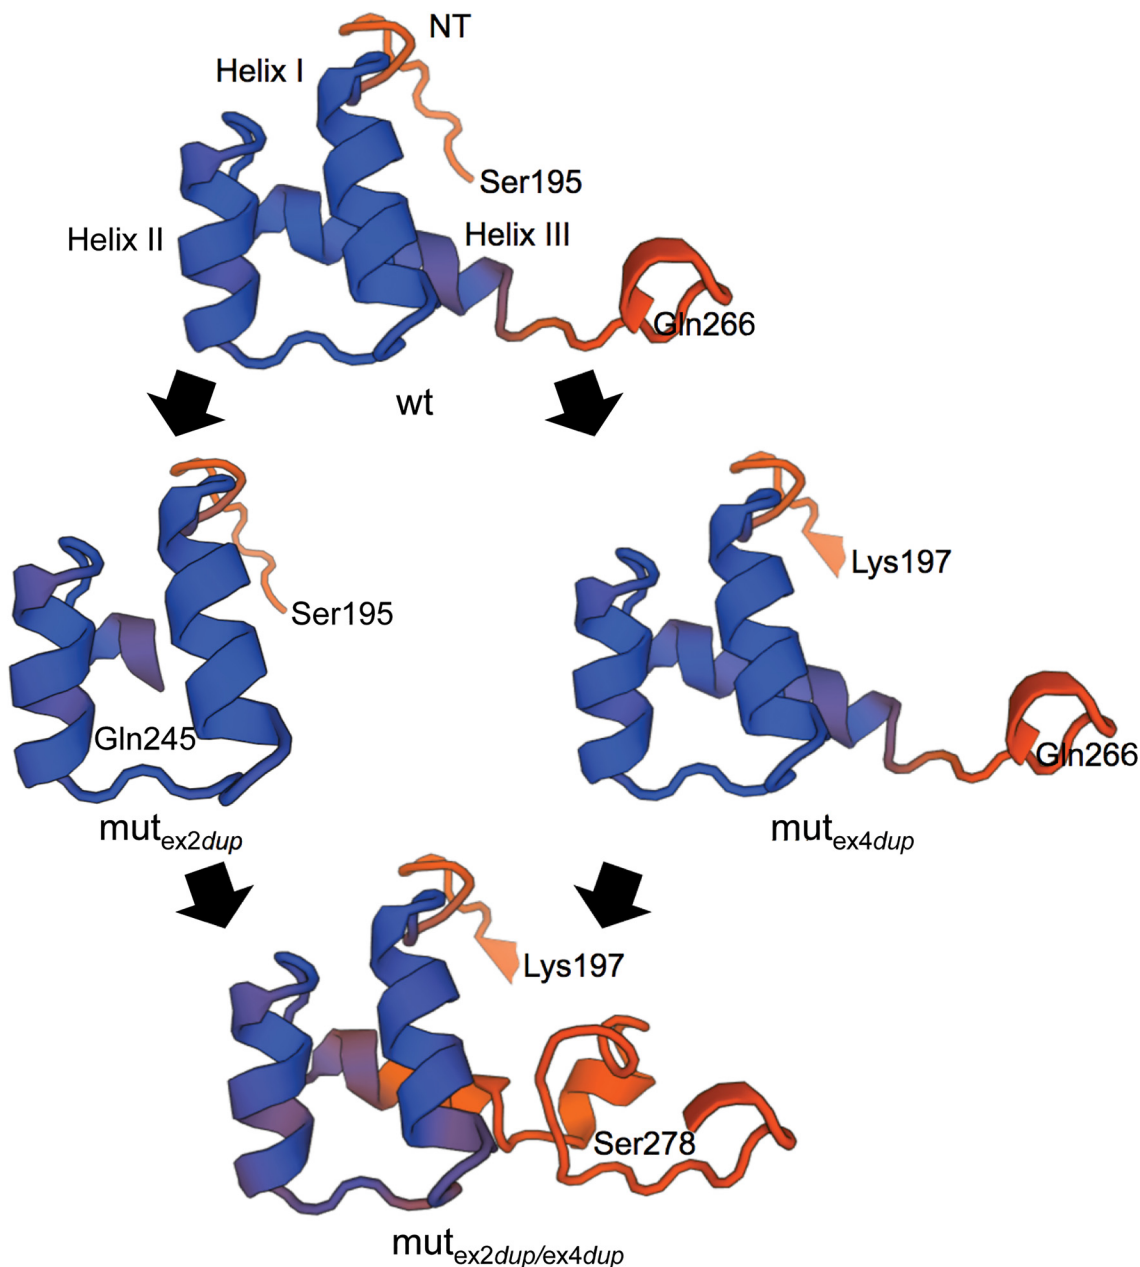

**Fig 8. Homology modelling of the homeodomains of the exon 2 and exon 4 duplication ALX4 protein.** Protein structures were predicted using the SWISS-Model workspace [52, 53]. The human ALX4 homeodomain structure has been determined by solution NMR and was used for homology modelling [54]. The three homeodomain helices (helix I, helix II, helix III) and amino acids with corresponding locations are indicated. NT: N-terminal arm.

doi:10.1371/journal.pone.0129208.g008



alignments of the three variants and the location of the important DNA binding helices of the homeodomain. Consequently, the effect of the exon 2 duplication on the secondary or tertiary structure of the homeodomain was analyzed. Fig 8 shows the results of the protein homology modelling analysis of the homeodomains of the three bovine ALX4 variants in comparison to wild type ALX4 based on the solution NMR structure of the human ALX4 homeodomain [54, 55]. As expected, the exon 2 duplication resulted in a substantially altered secondary and tertiary structure of the homeodomain which supports the explanation for a loss of function. Although both duplications result in a longer protein, the addition of the exon 4 duplication does not restore the ALX4 homeodomain structure.

In conclusion, TH in Galloway cattle is most likely caused by a duplication of 20 bp in exon 2 of the *ALX4* gene resulting in a frameshift and disruption of helix III of the homeodomain. As the candidate causal defect for TH in Galloway cattle has now been resolved, it will be possible to test the population and/or important breeding animals and implement genotyping results into breeding programs to avoid a further uncontrolled spread of the recessive mutant allele.

## Acknowledgments

The authors are thankful to Sabrina Pach for expert technical assistance and Sandra Knobloch (Veterinary Practice Hausdorf) for preparing the X-rays and Cornel Wiedemann for editing the photos. Special thanks go to the Galloway cattle breeder Kurt Kipping (Rüx/Germany) for providing the cases of TH.

## Author Contributions

Conceived and designed the experiments: BB MF. Performed the experiments: BB ES MF MH PS. Analyzed the data: BB ES MF MH PS. Contributed reagents/materials/analysis tools: BB ES MF MH PS. Wrote the paper: BB.

## References

1. Benazet JD, Zeller R. Vertebrate limb development: moving from classical morphogen gradients to an integrated 4-dimensional patterning system. *Cold Spring Harbor perspectives in biology*. 2009; 1(4): a001339. doi: [10.1101/cshperspect.a001339](https://doi.org/10.1101/cshperspect.a001339) PMID: [20066096](https://pubmed.ncbi.nlm.nih.gov/20066096/); PubMed Central PMCID: PMC2773624.
2. Niswander L. Pattern formation: old models out on a limb. *Nature reviews Genetics*. 2003; 4(2):133–43. doi: [10.1038/nrg1001](https://doi.org/10.1038/nrg1001) PMID: [12560810](https://pubmed.ncbi.nlm.nih.gov/12560810/).
3. Boras-Granic K, Grosschedl R, Hamel PA. Genetic interaction between Lef1 and Alx4 is required for early embryonic development. *The International journal of developmental biology*. 2006; 50(7):601–10. doi: [10.1387/ijdb.062153kb](https://doi.org/10.1387/ijdb.062153kb) PMID: [16892173](https://pubmed.ncbi.nlm.nih.gov/16892173/).
4. Panman L, Drenth T, Tewelscher P, Zuniga A, Zeller R. Genetic interaction of Gli3 and Alx4 during limb development. *The International journal of developmental biology*. 2005; 49(4):443–8. doi: [10.1387/ijdb.051984lp](https://doi.org/10.1387/ijdb.051984lp) PMID: [15968591](https://pubmed.ncbi.nlm.nih.gov/15968591/).
5. Dee CT, Szymoniuk CR, Mills PE, Takahashi T. Defective neural crest migration revealed by a Zebrafish model of Alx1-related frontonasal dysplasia. *Human molecular genetics*. 2013; 22(2):239–51. doi: [10.1093/hmg/dds423](https://doi.org/10.1093/hmg/dds423) PMID: [23059813](https://pubmed.ncbi.nlm.nih.gov/23059813/).
6. Etensohn CA, Illies MR, Oliveri P, De Jong DL. Alx1, a member of the Cart1/Alx3/Alx4 subfamily of Paired-class homeodomain proteins, is an essential component of the gene network controlling skeletogenic fate specification in the sea urchin embryo. *Development*. 2003; 130(13):2917–28. PMID: [12756175](https://pubmed.ncbi.nlm.nih.gov/12756175/).
7. Hall CR, Wu Y, Shaffer LG, Hecht JT. Familial case of Potocki-Shaffer syndrome associated with microdeletion of EXT2 and ALX4. *Clinical genetics*. 2001; 60(5):356–9. PMID: [11903336](https://pubmed.ncbi.nlm.nih.gov/11903336/).
8. Hudson R, Taniguchi-Sidle A, Boras K, Wiggan O, Hamel PA. Alx-4, a transcriptional activator whose expression is restricted to sites of epithelial-mesenchymal interactions. *Developmental dynamics: an*

- official publication of the American Association of Anatomists. 1998; 213(2):159–69. doi: [10.1002/\(SICI\)1097-0177\(199810\)213:2<159::AID-AJA1>3.0.CO;2-F](https://doi.org/10.1002/(SICI)1097-0177(199810)213:2<159::AID-AJA1>3.0.CO;2-F) PMID: [9786416](https://pubmed.ncbi.nlm.nih.gov/9786416/).
9. Kuijper S, Feitsma H, Sheth R, Korving J, Reijnen M, Meijlink F. Function and regulation of Alx4 in limb development: complex genetic interactions with Gli3 and Shh. *Developmental biology*. 2005; 285(2):533–44. doi: [10.1016/j.ydbio.2005.06.017](https://doi.org/10.1016/j.ydbio.2005.06.017) PMID: [16039644](https://pubmed.ncbi.nlm.nih.gov/16039644/).
  10. Takahashi M, Tamura K, Buscher D, Masuya H, Yonei-Tamura S, Matsumoto K, et al. The role of Alx-4 in the establishment of anteroposterior polarity during vertebrate limb development. *Development*. 1998; 125(22):4417–25. PMID: [9778501](https://pubmed.ncbi.nlm.nih.gov/9778501/).
  11. Rice R, Rice DP, Olsen BR, Thesleff I. Progression of calvarial bone development requires Foxc1 regulation of Msx2 and Alx4. *Developmental biology*. 2003; 262(1):75–87. PMID: [14512019](https://pubmed.ncbi.nlm.nih.gov/14512019/).
  12. Kariminejad A, Bozorgmehr B, Alizadeh H, Ghaderi-Sohi S, Toksoy G, Uyguner ZO, et al. Skull defects, alopecia, hypertelorism, and notched alae nasi caused by homozygous ALX4 gene mutation. *American journal of medical genetics Part A*. 2014; 164A(5):1322–7. doi: [10.1002/ajmg.a.36008](https://doi.org/10.1002/ajmg.a.36008) PMID: [24668755](https://pubmed.ncbi.nlm.nih.gov/24668755/).
  13. Bertola DR, Rodrigues MG, Quaio CR, Kim CA, Passos-Bueno MR. Vertical transmission of a frontonasal phenotype caused by a novel ALX4 mutation. *American journal of medical genetics Part A*. 2013; 161A(3):600–4. doi: [10.1002/ajmg.a.35762](https://doi.org/10.1002/ajmg.a.35762) PMID: [23401352](https://pubmed.ncbi.nlm.nih.gov/23401352/).
  14. Kayserili H, Altunoglu U, Ozgur H, Basaran S, Uyguner ZO. Mild nasal malformations and parietal foramina caused by homozygous ALX4 mutations. *American journal of medical genetics Part A*. 2012; 158A(1):236–44. doi: [10.1002/ajmg.a.34390](https://doi.org/10.1002/ajmg.a.34390) PMID: [22140057](https://pubmed.ncbi.nlm.nih.gov/22140057/).
  15. Kayserili H, Uz E, Niessen C, Vargel I, Alanay Y, Tuncbilek G, et al. ALX4 dysfunction disrupts craniofacial and epidermal development. *Human molecular genetics*. 2009; 18(22):4357–66. doi: [10.1093/hmg/ddp391](https://doi.org/10.1093/hmg/ddp391) PMID: [19692347](https://pubmed.ncbi.nlm.nih.gov/19692347/).
  16. Mavrogiannis LA, Antonopoulou I, Baxova A, Kutilek S, Kim CA, Sugayama SM, et al. Haploinsufficiency of the human homeobox gene ALX4 causes skull ossification defects. *Nature genetics*. 2001; 27(1):17–8. doi: [10.1038/83703](https://doi.org/10.1038/83703) PMID: [11137991](https://pubmed.ncbi.nlm.nih.gov/11137991/).
  17. Wuyts W, Cleiren E, Homfray T, Rasore-Quartino A, Vanhoenacker F, Van Hul W. The ALX4 homeobox gene is mutated in patients with ossification defects of the skull (foramina parietalia permagna, OMIM 168500). *Journal of medical genetics*. 2000; 37(12):916–20. PMID: [11106354](https://pubmed.ncbi.nlm.nih.gov/11106354/); PubMed Central PMCID: [PMC1734509](https://pubmed.ncbi.nlm.nih.gov/PMC1734509/).
  18. Charlier C, Agerholm JS, Coppieters W, Karlskov-Mortensen P, Li W, de Jong G, et al. A deletion in the bovine FANCI gene compromises fertility by causing fetal death and brachyspina. *PLoS one*. 2012; 7(8):e43085. doi: [10.1371/journal.pone.0043085](https://doi.org/10.1371/journal.pone.0043085) PMID: [22952632](https://pubmed.ncbi.nlm.nih.gov/22952632/); PubMed Central PMCID: [PMC3430679](https://pubmed.ncbi.nlm.nih.gov/PMC3430679/).
  19. Drögemüller C, Leeb T, Harlizius B, Tammen I, Distl O, Holtersshinken M, et al. Congenital syndactyly in cattle: four novel mutations in the low density lipoprotein receptor-related protein 4 gene (LRP4). *BMC genetics*. 2007; 8:5. doi: [10.1186/1471-2156-8-5](https://doi.org/10.1186/1471-2156-8-5) PMID: [17319939](https://pubmed.ncbi.nlm.nih.gov/17319939/); PubMed Central PMCID: [PMC1810560](https://pubmed.ncbi.nlm.nih.gov/PMC1810560/).
  20. Thomsen B, Horn P, Panitz F, Bendixen E, Petersen AH, Holm LE, et al. A missense mutation in the bovine SLC35A3 gene, encoding a UDP-N-acetylglucosamine transporter, causes complex vertebral malformation. *Genome research*. 2006; 16(1):97–105. doi: [10.1101/gr.3690506](https://doi.org/10.1101/gr.3690506) PMID: [16344554](https://pubmed.ncbi.nlm.nih.gov/16344554/); PubMed Central PMCID: [PMC1356133](https://pubmed.ncbi.nlm.nih.gov/PMC1356133/).
  21. Drögemüller C, Distl O. Genetic analysis of syndactyly in German Holstein cattle. *Veterinary journal*. 2006; 171(1):120–5. doi: [10.1016/j.tvjl.2004.09.009](https://doi.org/10.1016/j.tvjl.2004.09.009) PMID: [16427589](https://pubmed.ncbi.nlm.nih.gov/16427589/).
  22. Agerholm JS, McEvoy F, Arnbjerg J. Brachyspina syndrome in a Holstein calf. *Journal of veterinary diagnostic investigation: official publication of the American Association of Veterinary Laboratory Diagnosticians, Inc.* 2006; 18(4):418–22. PMID: [16921889](https://pubmed.ncbi.nlm.nih.gov/16921889/).
  23. Agerholm JS, Bendixen C, Andersen O, Arnbjerg J. Complex vertebral malformation in holstein calves. *Journal of veterinary diagnostic investigation: official publication of the American Association of Veterinary Laboratory Diagnosticians, Inc.* 2001; 13(4):283–9. PMID: [11478598](https://pubmed.ncbi.nlm.nih.gov/11478598/).
  24. Leipold HW, Schmidt GL, Steffen DJ, Vestweber JG, Huston K. Hereditary syndactyly in Angus cattle. *Journal of veterinary diagnostic investigation: official publication of the American Association of Veterinary Laboratory Diagnosticians, Inc.* 1998; 10(3):247–54. PMID: [9683073](https://pubmed.ncbi.nlm.nih.gov/9683073/).
  25. Lapointe JM, Lachance S, Steffen DJ. Tibial hemimelia, meningocele, and abdominal hernia in Short-horn cattle. *Veterinary pathology*. 2000; 37(5):508–11. PMID: [11055885](https://pubmed.ncbi.nlm.nih.gov/11055885/).
  26. Ojo SA, Guffy MM, Saperstein G, Leipold HW. Tibial hemimelia in Galloway calves. *Journal of the American Veterinary Medical Association*. 1974; 165(6):548–50. PMID: [4416648](https://pubmed.ncbi.nlm.nih.gov/4416648/).
  27. Salako MA, Abdullahi US. Tibial hemimelia in a Bunaji calf. *The Veterinary record*. 1982; 110(18):430. PMID: [7090160](https://pubmed.ncbi.nlm.nih.gov/7090160/).

28. Young GB. A case of tibial hemimelia in cattle. *The British veterinary journal*. 1951; 107(1):23–8. PMID: [14812141](#).
29. Whitlock BK, Kaiser L, Maxwell HS. Heritable bovine fetal abnormalities. *Theriogenology*. 2008; 70(3):535–49. doi: [10.1016/j.theriogenology.2008.04.016](#) PMID: [18514810](#).
30. Guffy MM, Leipold HW. Radiological Diagnosis of Economically Important Genetic Defects in Cattle. *Vet Radiol Ultrasound*. 1977; 18(4):109–15.
31. Szczeral I, Stefaniak T, Dubiel A, Siembieda J, Nizanski W, Switonski M. Chromosome instability in a calf with amelia of thoracic limbs. *Veterinary pathology*. 2006; 43(5):789–92. doi: [10.1354/vp.43-5-789](#) PMID: [16966464](#).
32. Jones D, Barnes J, Lloyd-Roberts GC. Congenital aplasia and dysplasia of the tibia with intact fibula. Classification and management. *The Journal of bone and joint surgery British volume*. 1978; 60(1):31–9. PMID: [627576](#).
33. Wöhlke A, Kuiper H, Distl O, Drögemüller C. The bovine aristaless-like homeobox 4 (ALX4) as a candidate gene for syndactyly. *Cytogenetic and genome research*. 2006; 115(2):123–8. doi: [10.1159/000095231](#) PMID: [17065792](#).
34. Miller SA, Dykes DD, Polesky HF. A simple salting out procedure for extracting DNA from human nucleated cells. *Nucleic acids research*. 1988; 16(3):1215. PMID: [3344216](#); PubMed Central PMCID: PMC334765.
35. den Dunnen JT, Antonarakis SE. Mutation nomenclature extensions and suggestions to describe complex mutations: a discussion. *Human mutation*. 2000; 15(1):7–12. doi: [10.1002/\(SICI\)1098-1004\(200001\)15:1<7::AID-HUMU4>3.0.CO;2-N](#) PMID: [10612815](#).
36. Rozen S, Skaletsky H. Primer3 on the WWW for general users and for biologist programmers. *Methods in molecular biology*. 2000; 132:365–86. PMID: [10547847](#).
37. von Ahsen N, Oellerich M, Armstrong VW, Schütz E. Application of a thermodynamic nearest-neighbor model to estimate nucleic acid stability and optimize probe design: prediction of melting points of multiple mutations of apolipoprotein B-3500 and factor V with a hybridization probe genotyping assay on the LightCycler. *Clinical chemistry*. 1999; 45(12):2094–101. PMID: [10585340](#).
38. Schütz E, von Ahsen N. Spreadsheet software for thermodynamic melting point prediction of oligonucleotide hybridization with and without mismatches. *BioTechniques*. 1999; 27(6):1218–22, 24. PMID: [10631501](#).
39. Desmet FO, Hamroun D, Lalande M, Collod-Beroud G, Claustres M, Beroud C. Human Splicing Finder: an online bioinformatics tool to predict splicing signals. *Nucleic acids research*. 2009; 37(9):e67. doi: [10.1093/nar/gkp215](#) PMID: [19339519](#); PubMed Central PMCID: PMC2685110.
40. Reese MG, Eeckman FH, Kulp D, Haussler D. Improved splice site detection in Genie. *Journal of computational biology: a journal of computational molecular cell biology*. 1997; 4(3):311–23. PMID: [9278062](#).
41. Tavtigian SV, Greenblatt MS, Lesueur F, Byrnes GB, Group IUGVW. In silico analysis of missense substitutions using sequence-alignment based methods. *Human mutation*. 2008; 29(11):1327–36. doi: [10.1002/humu.20892](#) PMID: [18951440](#); PubMed Central PMCID: PMC3431198.
42. Erickson RP. Agenesis of tibia with bifid femur, congenital heart disease, and cleft lip with cleft palate or tracheoesophageal fistula: possible variants of Gollop-Wolfgang complex. *American journal of medical genetics Part A*. 2005; 134(3):315–7. doi: [10.1002/ajmg.a.30636](#) PMID: [15732065](#).
43. Evans JA, Chudley AE. Tibial agenesis, femoral duplication, and caudal midline anomalies. *American journal of medical genetics*. 1999; 85(1):13–9. PMID: [10377008](#).
44. Mendilcioglu I, Mihci E, Pestereli E, Simsek M. Prenatal diagnosis of Gollop-Wolfgang complex (tibial agenesis and femoral bifurcation). *Prenatal diagnosis*. 2009; 29(2):182–6. doi: [10.1002/pd.2204](#) PMID: [19180625](#).
45. Stevens CA, Moore CA. Tibial hemimelia in Langer-Giedion syndrome—possible gene location for tibial hemimelia at 8q. *American journal of medical genetics*. 1999; 85(4):409–12. PMID: [10398269](#).
46. Ferrarini A, Gaillard M, Guerry F, Ramelli G, Heidi F, Keddache CV, et al. Potocki-Shaffer deletion encompassing ALX4 in a patient with frontonasal dysplasia phenotype. *American journal of medical genetics Part A*. 2014; 164A(2):346–52. doi: [10.1002/ajmg.a.36140](#) PMID: [24376213](#).
47. Matsumaru D, Haraguchi R, Moon AM, Satoh Y, Nakagata N, Yamamura K, et al. Genetic analysis of the role of Alx4 in the coordination of lower body and external genitalia formation. *European journal of human genetics: EJHG*. 2014; 22(3):350–7. doi: [10.1038/ejhg.2013.160](#) PMID: [23942202](#); PubMed Central PMCID: PMC3925283.
48. Chen B, Chen L, Zhou Y, Mi T, Chen DY, Chen L, et al. Multiple abnormalities due to a nonsense mutation in the Alx4 gene. *Genetics and molecular research: GMR*. 2013; 12(3):2771–8. doi: [10.4238/2013.August.2.2](#) PMID: [23979902](#).

49. Beever J, Marron B, inventors Screening for the genetic defect causing tibial hemimelia in bovines. USA2012.
50. Pollock DL, Fitzsimons J, Deas WD, Fraser JA. Pregnancy termination in the control of the tibial hemimelia syndrome in Galloway cattle. *The Veterinary record*. 1979; 104(12):258–60. PMID: [473505](#).
51. Colloton J. Reproductive ultrasound of female cattle. In: Hopper R, editor. *Bovine Reproduction*: Wiley-Blackwell; 2014. p. 226–46.
52. Arnold K, Bordoli L, Kopp J, Schwede T. The SWISS-MODEL workspace: a web-based environment for protein structure homology modelling. *Bioinformatics*. 2006; 22(2):195–201. doi: [10.1093/bioinformatics/bti770](#) PMID: [16301204](#).
53. Bordoli L, Kiefer F, Arnold K, Benkert P, Battey J, Schwede T. Protein structure homology modeling using SWISS-MODEL workspace. *Nature protocols*. 2009; 4(1):1–13. doi: [10.1038/nprot.2008.197](#) PMID: [19131951](#).
54. Xu X, Pulavarti SV, Eletsky A, Huang YJ, Acton TB, Xiao R, et al. Solution NMR structures of homeodomains from human proteins ALX4, ZHX1, and CASP8AP2 contribute to the structural coverage of the Human Cancer Protein Interaction Network. *Journal of structural and functional genomics*. 2014; 15(4):201–7. doi: [10.1007/s10969-014-9184-z](#) PMID: [24941917](#); PubMed Central PMCID: PMC4239167.
55. Tung CS. Structural study of homeodomain protein-DNA complexes using a homology modeling approach. *Journal of biomolecular structure & dynamics*. 1999; 17(2):347–54. doi: [10.1080/07391102.1999.10508366](#) PMID: [10563583](#).
56. Brouwer A, ten Berge D, Wiegerinck R, Meijlink F. The OAR/aristaless domain of the homeodomain protein *Cart1* has an attenuating role in vivo. *Mechanisms of development*. 2003; 120(2):241–52. PMID: [12559496](#).
57. Shang Z, Isaac VE, Li H, Patel L, Catron KM, Curran T, et al. Design of a "minimAI" homeodomain: the N-terminal arm modulates DNA binding affinity and stabilizes homeodomain structure. *Proceedings of the National Academy of Sciences of the United States of America*. 1994; 91(18):8373–7. PMID: [7915838](#); PubMed Central PMCID: PMC44608.
58. Bennett RL, French KS, Resta RG, Doyle DL. Standardized human pedigree nomenclature: update and assessment of the recommendations of the National Society of Genetic Counselors. *Journal of genetic counseling*. 2008; 17(5):424–33. doi: [10.1007/s10897-008-9169-9](#) PMID: [18792771](#).
59. Lynch VJ, Roth JJ, Wagner GP. Adaptive evolution of Hox-gene homeodomains after cluster duplications. *BMC evolutionary biology*. 2006; 6:86. doi: [10.1186/1471-2148-6-86](#) PMID: [17078881](#); PubMed Central PMCID: PMC1636070.
